# Supplementary material for: Exposure of C57BL/6J mice to long photoperiod during early life stages increases body weight and alters plasma metabolomic profiles in adulthood
Source: PubMed Central journal article supplement (PMC5037922; doi:10.14814/phy2.12974), 2016-09-20
Supplement: PHY2-4-e12974-s001.pdf [file PHY2-4-e12974-s001.pdf]

Supplemental Table 1. Plasma metabolites detected in the CE-TOFMS

| Compound name                     | Relative area |         |         |         |         |         | Mean    |         | Comparative analysis |                              |
|-----------------------------------|---------------|---------|---------|---------|---------|---------|---------|---------|----------------------|------------------------------|
|                                   | SDC1          | SDC2    | SDC3    | 0-4LD1  | 0-4LD2  | 0-4LD3  | SDC     | 0-4LD   | Ratio <sup>*</sup>   | <i>P</i> -value <sup>†</sup> |
| Adenosine                         | 8.1E-05       | 7.1E-05 | 1.7E-04 | 9.5E-04 | 1.4E-03 | 3.1E-03 | 1.1E-04 | 1.8E-03 | 17                   | 0.0611                       |
| Inosine                           | 1.7E-04       | 2.2E-04 | 1.3E-03 | 4.8E-03 | 2.5E-03 | 3.9E-03 | 5.5E-04 | 3.8E-03 | 6.8                  | 0.0133 #                     |
| IMP                               | 4.8E-05       | N.D.    | 6.3E-05 | 4.4E-04 | 1.3E-04 | 5.2E-04 | 5.6E-05 | 3.7E-04 | 6.6                  | 0.1375                       |
| Serotonin                         | 8.1E-04       | 5.9E-04 | 1.7E-03 | 5.9E-03 | 3.8E-03 | 7.0E-03 | 1.0E-03 | 5.6E-03 | 5.4                  | 0.0099 ##                    |
| 3-(4)Hydroxyphenyl)propionic acid | 3.1E-04       | 3.6E-04 | 2.6E-04 | 1.1E-03 | 1.4E-03 | 1.3E-03 | 3.1E-04 | 1.2E-03 | 4.0                  | 0.0006 ###                   |
| 1-Methylhistamine                 | 4.8E-05       | 4.5E-05 | 6.6E-05 | 1.7E-04 | 1.6E-04 | 1.9E-04 | 5.3E-05 | 1.7E-04 | 3.3                  | 0.0002 ###                   |
| Guanosine                         | 3.1E-05       | N.D.    | 7.9E-05 | 1.8E-04 | 1.3E-04 | 1.7E-04 | 5.5E-05 | 1.6E-04 | 2.9                  | 0.0342 #                     |
| 4-Acetamidobutanoic acid          | 3.4E-04       | 2.8E-04 | 3.5E-04 | 6.1E-04 | 5.9E-04 | 6.2E-04 | 3.2E-04 | 6.1E-04 | 1.9                  | 0.0003 ###                   |
| Phosphoenolpyruvic acid           | 1.9E-04       | 1.3E-04 | 1.5E-04 | 3.3E-04 | 2.1E-04 | 3.2E-04 | 1.5E-04 | 2.9E-04 | 1.9                  | 0.0352 #                     |
| β-Ala                             | 3.7E-04       | 3.8E-04 | 3.9E-04 | 5.9E-04 | 6.0E-04 | 8.1E-04 | 3.8E-04 | 6.6E-04 | 1.7                  | 0.0187 #                     |
| Phosphorylcholine                 | 5.6E-04       | 7.1E-04 | 5.7E-04 | 1.1E-03 | 9.2E-04 | 1.2E-03 | 6.1E-04 | 1.1E-03 | 1.7                  | 0.0080 ##                    |
| Pyruvic acid                      | 5.3E-03       | 4.9E-03 | 4.3E-03 | 6.8E-03 | 8.3E-03 | 9.5E-03 | 4.8E-03 | 8.2E-03 | 1.7                  | 0.0157 #                     |
| Isovalerylalanine-1               | 1.8E-04       | 1.8E-04 | 5.5E-04 | 8.5E-04 | 4.2E-04 | 2.2E-04 | 3.0E-04 | 5.0E-04 | 1.6                  | 0.4376                       |
| N-Acetylleucine-1                 |               |         |         |         |         |         |         |         |                      |                              |
| Glycerophosphocholine             | 2.2E-03       | 1.5E-03 | 2.2E-03 | 3.1E-03 | 2.6E-03 | 3.9E-03 | 2.0E-03 | 3.2E-03 | 1.6                  | 0.0505                       |
| N-Formylmethionine                | 1.1E-04       | 8.2E-05 | 9.9E-05 | 1.3E-04 | 1.7E-04 | 1.6E-04 | 9.6E-05 | 1.5E-04 | 1.6                  | 0.0174 #                     |
| Anserine_divalent                 | 6.7E-04       | 5.5E-04 | 7.1E-04 | 1.1E-03 | 7.5E-04 | 1.2E-03 | 6.4E-04 | 1.0E-03 | 1.6                  | 0.0631                       |
| Isovalerylalanine-2               |               |         |         |         |         |         |         |         |                      |                              |
| N-Acetylleucine-2                 | 2.2E-04       | 2.9E-04 | 1.9E-04 | 3.2E-04 | 3.6E-04 | 4.3E-04 | 2.3E-04 | 3.7E-04 | 1.6                  | 0.0340 #                     |
| N-Acetylaspartic acid             | 1.6E-04       | 2.4E-04 | 3.8E-04 | 5.3E-04 | 2.8E-04 | 4.1E-04 | 2.6E-04 | 4.0E-04 | 1.6                  | 0.1989                       |
| Ethanolamine phosphate            | 1.9E-04       | 2.9E-04 | 3.0E-04 | 4.1E-04 | 3.9E-04 | 4.1E-04 | 2.6E-04 | 4.0E-04 | 1.6                  | 0.0171 #                     |
| Ribulose 5-phosphate              | 1.2E-03       | 8.4E-04 | 1.7E-03 | 2.4E-03 | 1.5E-03 | 1.9E-03 | 1.3E-03 | 2.0E-03 | 1.6                  | 0.1197                       |
| 1-Methyladenosine                 | 5.4E-05       | 5.1E-05 | 4.4E-05 | 9.4E-05 | 6.1E-05 | 7.2E-05 | 5.0E-05 | 7.6E-05 | 1.5                  | 0.0601                       |
| Taurine                           | 1.9E-02       | 1.7E-02 | 1.7E-02 | 3.0E-02 | 2.0E-02 | 2.9E-02 | 1.8E-02 | 2.6E-02 | 1.5                  | 0.0627                       |
| Glycerol 3-phosphate              | 8.7E-04       | 8.7E-04 | 9.8E-04 | 1.3E-03 | 1.1E-03 | 1.6E-03 | 9.1E-04 | 1.3E-03 | 1.5                  | 0.0333 #                     |
| Homocarnosine                     | 1.9E-04       | 1.9E-04 | 2.0E-04 | 3.7E-04 | 2.0E-04 | 2.9E-04 | 2.0E-04 | 2.9E-04 | 1.5                  | 0.1443                       |
| p-Hydroxybenzoic acid             | 3.0E-04       | 3.6E-04 | 1.9E-04 | 4.0E-04 | 4.0E-04 | 4.2E-04 | 2.8E-04 | 4.1E-04 | 1.4                  | 0.0772                       |
| Spermidine                        | 3.1E-05       | 4.7E-05 | 7.5E-05 | 8.9E-05 | 5.3E-05 | 7.7E-05 | 5.1E-05 | 7.3E-05 | 1.4                  | 0.2601                       |
| N-Acetylasparagine                | 7.9E-05       | 8.5E-05 | N.D.    | 9.4E-05 | 1.4E-04 | 1.2E-04 | 8.2E-05 | 1.2E-04 | 1.4                  | 0.1159                       |
| Guanidinosuccinic acid            | 1.3E-04       | 1.2E-04 | 1.4E-04 | 2.0E-04 | 1.9E-04 | 1.7E-04 | 1.3E-04 | 1.9E-04 | 1.4                  | 0.0031 ##                    |
| Creatine                          | 7.0E-02       | 6.3E-02 | 6.2E-02 | 1.1E-01 | 6.6E-02 | 1.0E-01 | 6.5E-02 | 9.2E-02 | 1.4                  | 0.1207                       |
| Carnosine                         | 2.4E-04       | 2.5E-04 | 2.6E-04 | 4.1E-04 | 2.5E-04 | 3.9E-04 | 2.5E-04 | 3.5E-04 | 1.4                  | 0.1144                       |
| Thiamine phosphate                | 6.8E-05       | 6.4E-05 | 6.9E-05 | 9.4E-05 | 7.9E-05 | 1.1E-04 | 6.7E-05 | 9.4E-05 | 1.4                  | 0.0396 #                     |
| Phenylpyruvic acid                | 1.3E-04       | 1.6E-04 | N.D.    | N.D.    | 2.1E-04 | 2.0E-04 | 1.5E-04 | 2.0E-04 | 1.4                  | 0.0636                       |
| Diethanolamine                    | 1.9E-04       | 2.3E-04 | 1.7E-04 | 2.6E-04 | 2.8E-04 | 2.7E-04 | 2.0E-04 | 2.7E-04 | 1.4                  | 0.0169 #                     |
| Glu                               | 1.4E-02       | 1.6E-02 | 1.2E-02 | 2.0E-02 | 1.6E-02 | 2.1E-02 | 1.4E-02 | 1.9E-02 | 1.4                  | 0.0516                       |
| Ectoine                           | 5.5E-04       | 5.1E-04 | 3.3E-04 | 4.0E-04 | 6.8E-04 | 8.0E-04 | 4.6E-04 | 6.3E-04 | 1.4                  | 0.2910                       |
| Galactosamine                     |               |         |         |         |         |         |         |         |                      |                              |
| Glucosamine                       | 1.0E-04       | 1.2E-04 | 9.7E-05 | 1.6E-04 | 1.3E-04 | N.D.    | 1.1E-04 | 1.4E-04 | 1.4                  | 0.0946                       |
| N-Acetyltryptophan                | 1.4E-04       | 1.5E-04 | 1.2E-04 | 1.8E-04 | 1.8E-04 | 1.9E-04 | 1.4E-04 | 1.8E-04 | 1.3                  | 0.0086 ##                    |
| Homocitrulline                    | 4.8E-04       | 3.6E-04 | 3.8E-04 | 5.5E-04 | 5.9E-04 | 4.8E-04 | 4.1E-04 | 5.4E-04 | 1.3                  | 0.0557                       |
| N-Acetylglutamine                 | 1.7E-04       | 1.5E-04 | 1.2E-04 | 1.7E-04 | 1.4E-04 | 2.7E-04 | 1.4E-04 | 1.9E-04 | 1.3                  | 0.3203                       |
| N-Acetylglycine                   | 5.2E-04       | 4.8E-04 | 7.0E-04 | 9.8E-04 | 6.1E-04 | 6.3E-04 | 5.6E-04 | 7.4E-04 | 1.3                  | 0.2763                       |
| XA0013                            | 3.3E-03       | 3.4E-03 | 2.9E-03 | 3.8E-03 | 3.8E-03 | 4.8E-03 | 3.2E-03 | 4.1E-03 | 1.3                  | 0.0724                       |
| Asp                               | 2.4E-03       | 5.0E-03 | 2.3E-03 | 4.4E-03 | 3.0E-03 | 5.0E-03 | 3.2E-03 | 4.1E-03 | 1.3                  | 0.4388                       |
| Choline                           | 1.3E-02       | 1.4E-02 | 1.1E-02 | 1.7E-02 | 1.4E-02 | 1.7E-02 | 1.3E-02 | 1.6E-02 | 1.3                  | 0.0581                       |

Supplemental Table 1 (Continued)

| Compound name                         | Relative area |         |         |         |         |         | Mean    |         | Comparative analysis |                              |
|---------------------------------------|---------------|---------|---------|---------|---------|---------|---------|---------|----------------------|------------------------------|
|                                       | SDC1          | SDC2    | SDC3    | 0-4LD1  | 0-4LD2  | 0-4LD3  | SDC     | 0-4LD   | Ratio <sup>*</sup>   | <i>P</i> -value <sup>†</sup> |
| 3-Ureidopropionic acid                | 1.4E-04       | 2.9E-04 | 1.9E-04 | 2.0E-04 | 3.3E-04 | 2.5E-04 | 2.1E-04 | 2.6E-04 | 1.3                  | 0.4146                       |
| Isocitric acid                        | 2.1E-03       | 2.1E-03 | 2.3E-03 | 2.7E-03 | 2.6E-03 | 2.7E-03 | 2.2E-03 | 2.7E-03 | 1.2                  | 0.0009 ###                   |
| Ile                                   | 5.6E-02       | 6.7E-02 | 5.0E-02 | 6.8E-02 | 6.7E-02 | 7.6E-02 | 5.7E-02 | 7.1E-02 | 1.2                  | 0.0833                       |
| <i>S</i> -Sulfocysteine               | 3.4E-04       | 6.1E-04 | 5.9E-04 | 5.9E-04 | 4.8E-04 | 8.2E-04 | 5.1E-04 | 6.3E-04 | 1.2                  | 0.4305                       |
| Val                                   | 9.9E-02       | 1.1E-01 | 8.4E-02 | 1.1E-01 | 1.2E-01 | 1.3E-01 | 9.8E-02 | 1.2E-01 | 1.2                  | 0.1110                       |
| Leu                                   | 9.8E-02       | 1.1E-01 | 8.4E-02 | 1.1E-01 | 1.2E-01 | 1.3E-01 | 9.8E-02 | 1.2E-01 | 1.2                  | 0.0769                       |
| Trigonelline                          | 2.6E-03       | 2.4E-03 | 1.5E-03 | 1.8E-03 | 2.8E-03 | 3.3E-03 | 2.2E-03 | 2.6E-03 | 1.2                  | 0.4396                       |
| Pipecolic acid                        | 2.2E-03       | 2.1E-03 | 2.1E-03 | 2.7E-03 | 2.3E-03 | 2.8E-03 | 2.1E-03 | 2.6E-03 | 1.2                  | 0.0301 #                     |
| 2-Oxoglutaric acid                    | 6.3E-03       | 7.5E-03 | 6.8E-03 | 7.0E-03 | 9.3E-03 | 8.5E-03 | 6.9E-03 | 8.3E-03 | 1.2                  | 0.1369                       |
| Ethanolamine                          | 1.3E-03       | 1.4E-03 | 1.1E-03 | 1.5E-03 | 1.4E-03 | 1.7E-03 | 1.3E-03 | 1.5E-03 | 1.2                  | 0.0847                       |
| Arg                                   | 3.6E-02       | 4.5E-02 | 3.4E-02 | 3.6E-02 | 4.3E-02 | 5.8E-02 | 3.9E-02 | 4.6E-02 | 1.2                  | 0.3610                       |
| 1-Methyl-4-imidazoleacetic acid       | 2.1E-04       | 3.7E-04 | 2.3E-04 | 3.3E-04 | 2.3E-04 | 4.0E-04 | 2.7E-04 | 3.2E-04 | 1.2                  | 0.5017                       |
| <i>O</i> -Acetylhomoserine            |               |         |         |         |         |         |         |         |                      |                              |
| 2-Aminoadipic acid                    | 1.2E-03       | 1.6E-03 | 1.4E-03 | 1.7E-03 | 1.5E-03 | 1.7E-03 | 1.4E-03 | 1.7E-03 | 1.2                  | 0.0862                       |
| XA0012                                | 2.8E-04       | 2.3E-04 | 2.4E-04 | 3.1E-04 | 3.1E-04 | 2.8E-04 | 2.5E-04 | 3.0E-04 | 1.2                  | 0.0484 #                     |
| Isethionic acid                       | 7.5E-04       | 5.5E-04 | 6.0E-04 | 8.9E-04 | 7.5E-04 | 6.1E-04 | 6.3E-04 | 7.5E-04 | 1.2                  | 0.3130                       |
| Thiamine                              | 1.0E-04       | 9.7E-05 | 1.2E-04 | 1.3E-04 | 1.5E-04 | 1.1E-04 | 1.1E-04 | 1.3E-04 | 1.2                  | 0.2281                       |
| <i>N</i> <sup>5</sup> -Ethylglutamine | 2.1E-03       | 1.8E-03 | 1.5E-03 | 1.8E-03 | 2.2E-03 | 2.4E-03 | 1.8E-03 | 2.1E-03 | 1.2                  | 0.2348                       |
| Terephthalic acid                     | 2.4E-04       | 2.3E-04 | 2.4E-04 | 3.1E-04 | 2.5E-04 | 2.8E-04 | 2.4E-04 | 2.8E-04 | 1.2                  | 0.0557                       |
| 11-Aminoundecanoic acid               | 8.8E-05       | 2.1E-04 | 1.3E-04 | 2.2E-04 | 1.7E-04 | 1.1E-04 | 1.4E-04 | 1.7E-04 | 1.2                  | 0.6395                       |
| 3-Phosphoglyceric acid                | 3.4E-04       | 1.8E-04 | 3.4E-04 | 4.5E-04 | 2.3E-04 | 3.3E-04 | 2.8E-04 | 3.3E-04 | 1.2                  | 0.5916                       |
| Kynurenine                            | 4.3E-04       | 3.6E-04 | 3.7E-04 | 3.9E-04 | 5.2E-04 | 4.5E-04 | 3.9E-04 | 4.5E-04 | 1.2                  | 0.2233                       |
| Trimethylamine <i>N</i> -oxide        | 3.4E-03       | 3.0E-03 | 3.2E-03 | 3.2E-03 | 3.8E-03 | 4.2E-03 | 3.2E-03 | 3.7E-03 | 1.2                  | 0.1486                       |
| <i>cis</i> -Aconitic acid             | 2.1E-03       | 1.9E-03 | 2.0E-03 | 2.0E-03 | 2.4E-03 | 2.5E-03 | 2.0E-03 | 2.3E-03 | 1.2                  | 0.1308                       |
| <i>N</i> -Acetylmethionine            | 1.2E-04       | 1.4E-04 | 6.6E-05 | 1.0E-04 | 1.4E-04 | 1.3E-04 | 1.1E-04 | 1.2E-04 | 1.2                  | 0.5121                       |
| <i>N</i> -Acetylgalactosamine         |               |         |         |         |         |         |         |         |                      |                              |
| <i>N</i> -Acetylmannosamine           | N.D.          | 3.0E-04 | 3.6E-04 | 3.9E-04 | 3.5E-04 | 4.1E-04 | 3.3E-04 | 3.8E-04 | 1.2                  | 0.1780                       |
| <i>N</i> -Acetylglucosamine           |               |         |         |         |         |         |         |         |                      |                              |
| Urocanic acid                         | 1.8E-04       | 4.5E-04 | 2.1E-04 | 3.9E-04 | 2.0E-04 | 3.8E-04 | 2.8E-04 | 3.2E-04 | 1.2                  | 0.6972                       |
| Nicotinamide                          | 4.3E-04       | 4.6E-04 | 6.5E-04 | 7.2E-04 | 4.7E-04 | 5.8E-04 | 5.1E-04 | 5.9E-04 | 1.1                  | 0.4907                       |
| 2'-Deoxycytidine                      | 2.7E-04       | 2.8E-04 | 2.4E-04 | 2.9E-04 | 2.9E-04 | 3.2E-04 | 2.6E-04 | 3.0E-04 | 1.1                  | 0.0651                       |
| 4-Guanidinobutyric acid               | 7.0E-04       | 6.5E-04 | 3.3E-04 | 4.5E-04 | 7.8E-04 | 6.9E-04 | 5.6E-04 | 6.4E-04 | 1.1                  | 0.6306                       |
| XC0001                                | 6.0E-05       | N.D.    | 8.7E-05 | 7.6E-05 | 8.4E-05 | 9.2E-05 | 7.3E-05 | 8.4E-05 | 1.1                  | 0.4456                       |
| 5-Oxoproline                          | 1.0E-03       | 1.5E-03 | 1.0E-03 | 1.4E-03 | 9.5E-04 | 1.6E-03 | 1.2E-03 | 1.3E-03 | 1.1                  | 0.5721                       |
| Homovanillic acid                     | 2.1E-04       | 2.5E-04 | 1.8E-04 | 2.4E-04 | 2.6E-04 | 2.3E-04 | 2.2E-04 | 2.5E-04 | 1.1                  | 0.2688                       |
| Urea                                  | 9.0E-01       | 9.3E-01 | 8.8E-01 | 9.5E-01 | 1.1E+00 | 1.1E+00 | 9.0E-01 | 1.0E+00 | 1.1                  | 0.0427 #                     |
| <i>N</i> -Acetylhistidine             | 1.7E-04       | 1.8E-04 | 9.7E-05 | 1.3E-04 | 1.7E-04 | 2.0E-04 | 1.5E-04 | 1.6E-04 | 1.1                  | 0.6175                       |
| Met                                   | 1.0E-02       | 1.1E-02 | 8.5E-03 | 9.1E-03 | 1.2E-02 | 1.3E-02 | 9.9E-03 | 1.1E-02 | 1.1                  | 0.4034                       |
| Carboxymethyllysine                   | 1.9E-04       | 1.2E-04 | 1.0E-04 | 1.5E-04 | 1.6E-04 | 1.4E-04 | 1.4E-04 | 1.5E-04 | 1.1                  | 0.5731                       |
| XC0016                                | 3.8E-04       | 3.3E-04 | 2.8E-04 | 3.2E-04 | 3.8E-04 | 4.0E-04 | 3.3E-04 | 3.7E-04 | 1.1                  | 0.3669                       |
| Pantothenic acid                      | 2.5E-04       | 2.2E-04 | 2.2E-04 | 2.6E-04 | 2.7E-04 | 2.4E-04 | 2.3E-04 | 2.6E-04 | 1.1                  | 0.1481                       |
| 3-Indoxylsulfuric acid                | 4.5E-03       | 6.3E-03 | 4.6E-03 | 4.4E-03 | 5.2E-03 | 7.3E-03 | 5.1E-03 | 5.7E-03 | 1.1                  | 0.6362                       |
| Pro                                   | 3.2E-02       | 3.9E-02 | 2.2E-02 | 2.8E-02 | 3.2E-02 | 4.2E-02 | 3.1E-02 | 3.4E-02 | 1.1                  | 0.6543                       |
| Lys                                   | 6.2E-02       | 7.8E-02 | 5.6E-02 | 6.4E-02 | 6.4E-02 | 8.8E-02 | 6.5E-02 | 7.2E-02 | 1.1                  | 0.5510                       |
| 2-Oxoisovaleric acid                  | 8.5E-04       | 9.8E-04 | 1.4E-03 | 1.2E-03 | 1.1E-03 | 1.2E-03 | 1.1E-03 | 1.2E-03 | 1.1                  | 0.5752                       |
| 2-Hydroxyglutaric acid                | 6.1E-04       | 7.1E-04 | 5.2E-04 | 4.8E-04 | 7.2E-04 | 7.9E-04 | 6.1E-04 | 6.7E-04 | 1.1                  | 0.6330                       |
| 5-Hydroxylysine                       | 4.0E-04       | 5.2E-04 | 2.8E-04 | 2.8E-04 | 4.4E-04 | 6.0E-04 | 4.0E-04 | 4.4E-04 | 1.1                  | 0.7632                       |

Supplemental Table 1 (Continued)

| Compound name                         | Relative area |         |         |         |         |         | Mean    |         | Comparative analysis |                              |   |
|---------------------------------------|---------------|---------|---------|---------|---------|---------|---------|---------|----------------------|------------------------------|---|
|                                       | SDC1          | SDC2    | SDC3    | 0-4LD1  | 0-4LD2  | 0-4LD3  | SDC     | 0-4LD   | Ratio <sup>*</sup>   | <i>P</i> -value <sup>†</sup> |   |
| Hypotaurine                           | 1.1E-03       | 1.3E-03 | 1.3E-03 | 1.2E-03 | 1.4E-03 | 1.5E-03 | 1.2E-03 | 1.4E-03 | 1.1                  | 0.3575                       |   |
| Creatinine                            | 3.8E-03       | 3.6E-03 | 3.7E-03 | 3.9E-03 | 4.1E-03 | 4.1E-03 | 3.7E-03 | 4.0E-03 | 1.1                  | 0.0281                       | # |
| Trp                                   | 4.3E-02       | 4.1E-02 | 3.4E-02 | 4.1E-02 | 4.4E-02 | 4.3E-02 | 4.0E-02 | 4.3E-02 | 1.1                  | 0.3349                       |   |
| Citric acid                           | 4.1E-02       | 4.2E-02 | 4.8E-02 | 4.7E-02 | 4.6E-02 | 4.8E-02 | 4.4E-02 | 4.7E-02 | 1.1                  | 0.2059                       |   |
| Cytidine                              | 5.1E-04       | 5.3E-04 | 5.0E-04 | 6.5E-04 | 5.1E-04 | 4.9E-04 | 5.1E-04 | 5.5E-04 | 1.1                  | 0.5050                       |   |
| Thr                                   | 3.6E-02       | 4.1E-02 | 3.0E-02 | 3.2E-02 | 3.5E-02 | 4.7E-02 | 3.6E-02 | 3.8E-02 | 1.1                  | 0.6919                       |   |
| Ornithine                             | 2.0E-02       | 2.7E-02 | 1.5E-02 | 1.7E-02 | 2.0E-02 | 2.8E-02 | 2.0E-02 | 2.2E-02 | 1.1                  | 0.8035                       |   |
| Tyr                                   | 3.0E-02       | 3.3E-02 | 2.0E-02 | 2.3E-02 | 3.0E-02 | 3.4E-02 | 2.8E-02 | 2.9E-02 | 1.1                  | 0.7879                       |   |
| <i>N</i> <sub>ω</sub> -Methylarginine | 1.2E-04       | 1.2E-04 | 8.8E-05 | 9.9E-05 | 1.1E-04 | 1.4E-04 | 1.1E-04 | 1.2E-04 | 1.1                  | 0.7370                       |   |
| Putrescine                            | 1.6E-04       | 1.6E-04 | 1.1E-04 | 1.4E-04 | 1.6E-04 | 1.4E-04 | 1.4E-04 | 1.5E-04 | 1.1                  | 0.7015                       |   |
| XC0040                                | 1.8E-04       | 1.9E-04 | 1.2E-04 | N.D.    | 1.8E-04 | 1.6E-04 | 1.6E-04 | 1.7E-04 | 1.0                  | 0.8246                       |   |
| γ-Glu-Val-Gly                         | 1.2E-04       | 7.3E-05 | 9.2E-05 | 6.8E-05 | 1.3E-04 | 1.1E-04 | 9.6E-05 | 1.0E-04 | 1.0                  | 0.8694                       |   |
| XA0035                                | 2.8E-04       | 2.6E-04 | 3.3E-04 | 3.2E-04 | 3.0E-04 | 2.9E-04 | 2.9E-04 | 3.0E-04 | 1.0                  | 0.6472                       |   |
| Cysteine glutathione disulfide        | 5.1E-03       | 5.6E-03 | 6.0E-03 | 5.3E-03 | 6.9E-03 | 5.0E-03 | 5.6E-03 | 5.7E-03 | 1.0                  | 0.7702                       |   |
| Butyrylcarnitine                      | 1.8E-03       | 1.8E-03 | 1.2E-03 | 1.2E-03 | 2.0E-03 | 1.8E-03 | 1.6E-03 | 1.7E-03 | 1.0                  | 0.8613                       |   |
| Ophthalmic acid                       | 2.5E-04       | 2.3E-04 | 1.9E-04 | 1.6E-04 | 3.6E-04 | 1.7E-04 | 2.2E-04 | 2.3E-04 | 1.0                  | 0.9216                       |   |
| XA0004                                | 6.1E-05       | 7.8E-05 | 5.6E-05 | N.D.    | 6.1E-05 | 7.3E-05 | 6.5E-05 | 6.7E-05 | 1.0                  | 0.8853                       |   |
| Phe                                   | 3.3E-02       | 4.0E-02 | 2.7E-02 | 3.0E-02 | 3.5E-02 | 3.7E-02 | 3.3E-02 | 3.4E-02 | 1.0                  | 0.8782                       |   |
| Uridine                               | 1.2E-03       | 1.4E-03 | 1.5E-03 | 1.5E-03 | 1.3E-03 | 1.3E-03 | 1.4E-03 | 1.4E-03 | 1.0                  | 0.7492                       |   |
| Asn                                   | 6.7E-03       | 9.6E-03 | 5.8E-03 | 7.2E-03 | 6.6E-03 | 8.9E-03 | 7.4E-03 | 7.6E-03 | 1.0                  | 0.9073                       |   |
| Cystathionine                         | 2.5E-04       | 2.2E-04 | 2.2E-04 | 2.1E-04 | 2.3E-04 | 2.7E-04 | 2.3E-04 | 2.4E-04 | 1.0                  | 0.8164                       |   |
| Gly                                   | 4.7E-02       | 5.1E-02 | 4.5E-02 | 5.0E-02 | 4.1E-02 | 5.5E-02 | 4.8E-02 | 4.9E-02 | 1.0                  | 0.8410                       |   |
| <i>S</i> -Adenosylmethionine          | 3.8E-05       | 2.6E-05 | 5.3E-05 | 4.4E-05 | 3.6E-05 | 3.9E-05 | 3.9E-05 | 4.0E-05 | 1.0                  | 0.9297                       |   |
| Glucuronic acid                       | 5.1E-04       | 4.2E-04 | 5.0E-04 | 4.9E-04 | 4.3E-04 | 5.2E-04 | 4.7E-04 | 4.8E-04 | 1.0                  | 0.8426                       |   |
| Galacturonic acid                     |               |         |         |         |         |         |         |         |                      |                              |   |
| SDMA                                  | 1.5E-04       | 1.8E-04 | 1.5E-04 | 1.8E-04 | 1.6E-04 | 1.5E-04 | 1.6E-04 | 1.6E-04 | 1.0                  | 0.8780                       |   |
| 5-Methoxyindoleacetic acid            | 2.2E-04       | 2.6E-04 | 2.2E-04 | 1.4E-04 | 2.9E-04 | 2.9E-04 | 2.4E-04 | 2.4E-04 | 1.0                  | 0.9541                       |   |
| Gluconolactone                        | 1.4E-03       | 1.1E-03 | 1.2E-03 | 1.3E-03 | 1.4E-03 | 1.2E-03 | 1.2E-03 | 1.3E-03 | 1.0                  | 0.9689                       |   |
| Cystine                               | 1.5E-03       | 2.2E-03 | 2.4E-03 | 2.1E-03 | 2.4E-03 | 1.7E-03 | 2.1E-03 | 2.1E-03 | 1.0                  | 0.9992                       |   |
| Ala                                   | 5.6E-02       | 7.0E-02 | 4.3E-02 | 4.8E-02 | 5.5E-02 | 6.6E-02 | 5.6E-02 | 5.6E-02 | 1.0                  | 0.9826                       |   |
| Imidazolelactic acid                  | 1.2E-04       | 9.4E-05 | 9.7E-05 | 1.0E-04 | 1.0E-04 | 1.1E-04 | 1.0E-04 | 1.0E-04 | 1.0                  | 0.9603                       |   |
| Glutathione (GSSG)_divalent           | 5.9E-03       | 6.1E-03 | 5.9E-03 | 5.2E-03 | 6.8E-03 | 5.8E-03 | 6.0E-03 | 5.9E-03 | 1.0                  | 0.9399                       |   |
| Lauric acid                           | 2.8E-03       | 2.5E-03 | 2.5E-03 | 2.6E-03 | 2.4E-03 | 2.6E-03 | 2.6E-03 | 2.5E-03 | 1.0                  | 0.8078                       |   |
| 2-Hydroxybutyric acid                 | 1.4E-03       | 1.8E-03 | 2.1E-03 | 1.8E-03 | 1.8E-03 | 1.6E-03 | 1.8E-03 | 1.7E-03 | 1.0                  | 0.9296                       |   |
| <i>o</i> -Hydroxybenzoic acid         | 4.5E-04       | 6.0E-04 | 3.3E-04 | 2.1E-04 | 5.5E-04 | 6.1E-04 | 4.6E-04 | 4.5E-04 | 1.0                  | 0.9722                       |   |
| Lactic acid                           | 4.0E-01       | 4.1E-01 | 3.4E-01 | 3.3E-01 | 4.0E-01 | 4.0E-01 | 3.8E-01 | 3.8E-01 | 1.0                  | 0.8899                       |   |
| Argininosuccinic acid                 | 1.1E-04       | 1.5E-04 | 9.1E-05 | 8.6E-05 | 9.6E-05 | 1.7E-04 | 1.2E-04 | 1.2E-04 | 1.0                  | 0.9534                       |   |
| <i>N</i> -Acetylalanine               | 1.6E-04       | 1.5E-04 | 1.4E-04 | 1.6E-04 | 1.7E-04 | 1.1E-04 | 1.5E-04 | 1.5E-04 | 1.0                  | 0.8993                       |   |
| Gln                                   | 1.2E-01       | 1.2E-01 | 1.1E-01 | 1.3E-01 | 9.8E-02 | 1.1E-01 | 1.2E-01 | 1.1E-01 | 1.0                  | 0.8321                       |   |
| Phenaceturic acid                     | 4.6E-04       | 3.7E-04 | 3.3E-04 | 4.1E-04 | 2.2E-04 | 5.1E-04 | 3.9E-04 | 3.8E-04 | 1.0                  | 0.9408                       |   |
| Stachydrine                           | 1.0E-02       | 7.9E-03 | 6.7E-03 | 6.6E-03 | 8.9E-03 | 8.6E-03 | 8.2E-03 | 8.0E-03 | 1.0                  | 0.8538                       |   |
| <i>N</i> <sup>6</sup> -Acetyllysine   | 3.5E-04       | 3.6E-04 | 3.4E-04 | 3.2E-04 | 3.9E-04 | 3.2E-04 | 3.5E-04 | 3.4E-04 | 1.0                  | 0.7033                       |   |
| 1-Methylhistidine                     |               |         |         |         |         |         |         |         |                      |                              |   |
| 3-Methylhistidine                     | 4.1E-03       | 3.8E-03 | 4.0E-03 | 4.1E-03 | 3.4E-03 | 4.2E-03 | 4.0E-03 | 3.9E-03 | 1.0                  | 0.6744                       |   |
| <i>N</i> <sup>6</sup> -Methyllysine   | 3.2E-03       | 3.2E-03 | 2.9E-03 | 2.7E-03 | 3.1E-03 | 3.3E-03 | 3.1E-03 | 3.0E-03 | 1.0                  | 0.6727                       |   |

Supplemental Table 1 (Continued)

| Compound name                      | Relative area |         |         |         |         |         | Mean    |         | Comparative analysis |           |
|------------------------------------|---------------|---------|---------|---------|---------|---------|---------|---------|----------------------|-----------|
|                                    | SDC1          | SDC2    | SDC3    | 0-4LD1  | 0-4LD2  | 0-4LD3  | SDC     | 0-4LD   | Ratio*               | P-value†  |
| 4-Methyl-2-oxovaleric acid         | 3.6E-03       | 3.3E-03 | 5.1E-03 | 4.4E-03 | 3.4E-03 | 3.7E-03 | 4.0E-03 | 3.8E-03 | 1.0                  | 0.7927    |
| 3-Methyl-2-oxovaleric acid         |               |         |         |         |         |         |         |         |                      |           |
| Myristoleic acid                   | 6.7E-05       | N.D.    | 7.9E-05 | 9.9E-05 | N.D.    | 4.0E-05 | 7.3E-05 | 6.9E-05 | 1.0                  | 0.9234    |
| 2'-Deoxyuridine                    | 3.1E-04       | 2.4E-04 | 3.2E-04 | 2.6E-04 | 3.0E-04 | 2.6E-04 | 2.9E-04 | 2.7E-04 | 0.9                  | 0.5866    |
| Gluconic acid                      | 2.8E-03       | 2.2E-03 | 2.6E-03 | 2.3E-03 | 2.4E-03 | 2.5E-03 | 2.5E-03 | 2.4E-03 | 0.9                  | 0.4981    |
| Uric acid                          | 4.8E-03       | 3.5E-03 | 4.0E-03 | 3.8E-03 | 3.4E-03 | 4.4E-03 | 4.1E-03 | 3.9E-03 | 0.9                  | 0.6418    |
| <i>N,N</i> -Dimethylglycine        | 3.7E-03       | 3.3E-03 | 3.1E-03 | 3.1E-03 | 3.0E-03 | 3.4E-03 | 3.4E-03 | 3.2E-03 | 0.9                  | 0.4084    |
| Glycolic acid                      | 3.6E-03       | 2.8E-03 | 4.0E-03 | 3.6E-03 | 3.1E-03 | 3.1E-03 | 3.5E-03 | 3.3E-03 | 0.9                  | 0.6181    |
| Ser                                | 2.2E-02       | 2.4E-02 | 2.0E-02 | 2.0E-02 | 1.8E-02 | 2.4E-02 | 2.2E-02 | 2.1E-02 | 0.9                  | 0.5203    |
| Citrulline                         | 1.9E-02       | 2.5E-02 | 1.9E-02 | 1.8E-02 | 1.6E-02 | 2.2E-02 | 2.1E-02 | 1.9E-02 | 0.9                  | 0.5274    |
| Thymidine                          | 5.0E-04       | 4.7E-04 | 4.5E-04 | 3.9E-04 | 4.3E-04 | 4.7E-04 | 4.7E-04 | 4.3E-04 | 0.9                  | 0.1861    |
| Hydroxyproline                     | 6.4E-03       | 7.2E-03 | 5.2E-03 | 4.8E-03 | 5.4E-03 | 6.7E-03 | 6.2E-03 | 5.6E-03 | 0.9                  | 0.4879    |
| XC0120                             | 3.5E-05       | 6.1E-05 | 3.7E-05 | 3.8E-05 | 4.5E-05 | 3.6E-05 | 4.4E-05 | 4.0E-05 | 0.9                  | 0.6443    |
| Threonine acid                     | 3.6E-03       | 2.9E-03 | 4.3E-03 | 3.7E-03 | 3.0E-03 | 3.0E-03 | 3.6E-03 | 3.2E-03 | 0.9                  | 0.4971    |
| Decanoic acid                      | 3.1E-04       | N.D.    | 2.6E-04 | 2.5E-04 | N.D.    | 2.6E-04 | 2.8E-04 | 2.5E-04 | 0.9                  | 0.3742    |
| Succinic acid                      | 5.4E-03       | 7.2E-03 | 5.7E-03 | 5.0E-03 | 5.6E-03 | 5.7E-03 | 6.1E-03 | 5.4E-03 | 0.9                  | 0.3355    |
| 2-Hydroxyvaleric acid              | 3.5E-03       | 3.0E-03 | 4.0E-03 | 3.2E-03 | 2.8E-03 | 3.5E-03 | 3.5E-03 | 3.1E-03 | 0.9                  | 0.3372    |
| 2-Aminoisobutyric acid             |               |         |         |         |         |         |         |         |                      |           |
| 2-Aminobutyric acid                | 1.6E-03       | 1.9E-03 | 1.5E-03 | 1.4E-03 | 1.4E-03 | 1.6E-03 | 1.7E-03 | 1.5E-03 | 0.9                  | 0.2212    |
| His                                | 2.4E-02       | 2.6E-02 | 2.0E-02 | 2.1E-02 | 2.0E-02 | 2.2E-02 | 2.3E-02 | 2.1E-02 | 0.9                  | 0.2259    |
| 2-Hydroxyisobutyric acid           | 1.3E-03       | 1.3E-03 | 1.7E-03 | 1.5E-03 | 9.6E-04 | 1.4E-03 | 1.4E-03 | 1.3E-03 | 0.9                  | 0.4405    |
| 3-Hydroxybutyric acid              | 1.3E-02       | 1.6E-02 | 3.6E-02 | 2.8E-02 | 1.5E-02 | 1.4E-02 | 2.2E-02 | 1.9E-02 | 0.9                  | 0.7876    |
| Fumaric acid                       | 1.2E-03       | 1.5E-03 | 1.1E-03 | 1.0E-03 | 9.4E-04 | 1.4E-03 | 1.3E-03 | 1.1E-03 | 0.9                  | 0.4887    |
| 7,8-Dihydrobiopterin               | N.D.          | 4.4E-05 | 5.6E-05 | 4.1E-05 | 4.7E-05 | 4.3E-05 | 5.0E-05 | 4.4E-05 | 0.9                  | 0.3115    |
| Carnitine                          | 2.8E-02       | 2.4E-02 | 2.2E-02 | 2.2E-02 | 1.9E-02 | 2.3E-02 | 2.5E-02 | 2.2E-02 | 0.9                  | 0.1969    |
| Malic acid                         | 1.6E-02       | 2.4E-02 | 1.7E-02 | 1.5E-02 | 1.4E-02 | 2.0E-02 | 1.9E-02 | 1.6E-02 | 0.9                  | 0.4873    |
| 2-Hydroxy-4-methylvaleric acid     | 9.2E-04       | 8.0E-04 | 7.9E-04 | 7.5E-04 | 6.6E-04 | 7.6E-04 | 8.4E-04 | 7.2E-04 | 0.9                  | 0.1060    |
| Guanidoacetic acid                 | 8.2E-04       | 1.1E-03 | 9.2E-04 | 7.4E-04 | 8.3E-04 | 8.7E-04 | 9.4E-04 | 8.1E-04 | 0.9                  | 0.2137    |
| Isovalerylcarnitine                | 3.0E-04       | 3.7E-04 | 2.5E-04 | 2.3E-04 | 2.5E-04 | 3.1E-04 | 3.1E-04 | 2.6E-04 | 0.8                  | 0.3509    |
| <i>N</i> -Acetylmuramic acid       | 9.5E-05       | 9.6E-05 | N.D.    | 5.2E-05 | 7.7E-05 | 1.1E-04 | 9.5E-05 | 8.0E-05 | 0.8                  | 0.5461    |
| <i>O</i> -Acetylcarnitine          | 2.6E-02       | 2.3E-02 | 3.0E-02 | 2.7E-02 | 2.0E-02 | 1.9E-02 | 2.6E-02 | 2.2E-02 | 0.8                  | 0.2280    |
| GABA                               | 2.3E-04       | 4.3E-04 | 1.6E-04 | 2.3E-04 | 2.3E-04 | 2.2E-04 | 2.7E-04 | 2.2E-04 | 0.8                  | 0.5739    |
| Glucose 6-phosphate                | 3.0E-04       | 3.3E-04 | 3.2E-04 | 3.0E-04 | 2.8E-04 | 1.9E-04 | 3.2E-04 | 2.6E-04 | 0.8                  | 0.1626    |
| Mucic acid                         | 5.2E-04       | 4.6E-04 | 4.7E-04 | 4.1E-04 | 3.8E-04 | 3.7E-04 | 4.8E-04 | 3.8E-04 | 0.8                  | 0.0146 #  |
| Glyceric acid                      | 7.5E-04       | 6.2E-04 | 5.9E-04 | 4.5E-04 | 5.2E-04 | 5.4E-04 | 6.6E-04 | 5.1E-04 | 0.8                  | 0.0556    |
| $\gamma$ -Butyrobetaine            | 2.1E-03       | 2.0E-03 | 1.7E-03 | 1.5E-03 | 1.4E-03 | 1.5E-03 | 1.9E-03 | 1.5E-03 | 0.8                  | 0.0261 #  |
| Pyridoxal                          | 1.2E-04       | 1.8E-04 | 1.3E-04 | 8.9E-05 | 1.2E-04 | 1.1E-04 | 1.4E-04 | 1.1E-04 | 0.7                  | 0.1440    |
| Sarcosine                          | 7.3E-04       | 7.5E-04 | N.D.    | 3.8E-04 | 5.1E-04 | 7.7E-04 | 7.4E-04 | 5.5E-04 | 0.7                  | 0.2868    |
| XC0061                             | 1.8E-03       | 2.0E-03 | 1.2E-03 | 1.1E-03 | 1.3E-03 | 1.2E-03 | 1.7E-03 | 1.2E-03 | 0.7                  | 0.1317    |
| Betaine                            | 5.1E-02       | 4.1E-02 | 3.5E-02 | 2.7E-02 | 2.8E-02 | 3.0E-02 | 4.2E-02 | 2.8E-02 | 0.7                  | 0.0386 #  |
| <i>S</i> -Methylmethionine         | 1.5E-04       | 1.2E-04 | 1.3E-04 | 7.9E-05 | 9.6E-05 | 9.4E-05 | 1.4E-04 | 9.0E-05 | 0.7                  | 0.0129 #  |
| Glycerol                           | 3.3E-02       | 3.2E-02 | 4.8E-02 | 2.5E-02 | 2.2E-02 | 2.3E-02 | 3.7E-02 | 2.4E-02 | 0.6                  | 0.0558    |
| <i>N</i> -Acetyl- $\beta$ -alanine | N.D.          | 6.3E-05 | 7.5E-05 | 3.4E-05 | 2.6E-05 | N.D.    | 6.9E-05 | 3.0E-05 | 0.4                  | 0.0352 #  |
| <i>N</i> -Acetylphenylalanine      | 2.5E-04       | 3.3E-04 | 2.0E-04 | 1.1E-04 | 1.1E-04 | 1.3E-04 | 2.6E-04 | 1.1E-04 | 0.4                  | 0.0184 #  |
| Phosphocreatine                    | 5.6E-04       | 4.3E-04 | 4.4E-04 | 8.0E-05 | 2.6E-04 | 1.2E-04 | 4.8E-04 | 1.5E-04 | 0.3                  | 0.0080 ## |
| 3-Phenylpropionic acid             | 7.7E-04       | 1.0E-03 | 7.6E-04 | 2.1E-04 | 1.9E-04 | 2.6E-04 | 8.5E-04 | 2.2E-04 | 0.3                  | 0.0016 ## |
| Cholic acid                        | 5.9E-04       | 5.1E-03 | 5.0E-04 | 4.7E-04 | 2.6E-04 | 5.8E-04 | 2.1E-03 | 4.4E-04 | 0.2                  | 0.3461    |

Supplemental Table 1 (Continued)

| Compound name                      | Relative area |         |         |         |         |         | Mean    |         | Comparative analysis |                      |
|------------------------------------|---------------|---------|---------|---------|---------|---------|---------|---------|----------------------|----------------------|
|                                    | SDC1          | SDC2    | SDC3    | 0-4LD1  | 0-4LD2  | 0-4LD3  | SDC     | 0-4LD   | Ratio <sup>a</sup>   | P-value <sup>†</sup> |
| Taurocholic acid                   | 3.9E-04       | 3.5E-03 | 2.1E-04 | 2.0E-04 | 2.3E-04 | 1.8E-04 | 1.4E-03 | 2.0E-04 | 0.15                 | 0.3400               |
| Hippuric acid                      | 2.0E-03       | 1.6E-03 | 1.5E-03 | 1.0E-04 | 1.3E-04 | 1.7E-04 | 1.7E-03 | 1.4E-04 | 0.08                 | 0.0005 ###           |
| 1-Methylnicotinamide               | N.D.          | N.D.    | N.D.    | N.D.    | 7.7E-05 | 8.5E-05 | N.D.    | 8.1E-05 | -                    | -                    |
| 5-Aminovaleric acid                | N.D.          | N.D.    | N.D.    | N.D.    | N.D.    | 1.1E-03 | N.D.    | 1.1E-03 | -                    | -                    |
| 6-Aminohexanoic acid               | N.D.          | N.D.    | N.D.    | N.D.    | 2.5E-04 | 2.8E-04 | N.D.    | 2.6E-04 | -                    | -                    |
| ADP                                | N.D.          | N.D.    | N.D.    | 3.3E-04 | 3.1E-04 | 5.7E-04 | N.D.    | 4.0E-04 | -                    | -                    |
| ATP                                | N.D.          | N.D.    | N.D.    | N.D.    | N.D.    | 7.1E-05 | N.D.    | 7.1E-05 | -                    | -                    |
| Adipic acid                        | N.D.          | N.D.    | N.D.    | N.D.    | N.D.    | 1.0E-04 | N.D.    | 1.0E-04 | -                    | -                    |
| Cyclohexylamine                    | N.D.          | N.D.    | N.D.    | N.D.    | 5.7E-05 | N.D.    | N.D.    | 5.7E-05 | -                    | -                    |
| Cytosine                           | N.D.          | N.D.    | N.D.    | N.D.    | N.D.    | 2.2E-04 | N.D.    | 2.2E-04 | -                    | -                    |
| Dihydroxyacetone phosphate         | N.D.          | N.D.    | N.D.    | 5.9E-04 | 1.9E-04 | 4.3E-04 | N.D.    | 4.0E-04 | -                    | -                    |
| N-Ethylmaleimide_+H <sub>2</sub> O | N.D.          | N.D.    | N.D.    | 1.9E-04 | N.D.    | N.D.    | N.D.    | 1.9E-04 | -                    | -                    |
| γ-Glu-2-aminobutyric acid          | N.D.          | N.D.    | N.D.    | N.D.    | N.D.    | 6.7E-05 | N.D.    | 6.7E-05 | -                    | -                    |
| 2,6-Diaminopimelic acid            | N.D.          | 1.3E-04 | N.D.    | N.D.    | N.D.    | N.D.    | 1.3E-04 | N.D.    | -                    | -                    |
| 8-Hydroxyoctanoic acid             | 5.4E-05       | N.D.    | N.D.    | N.D.    | N.D.    | N.D.    | 5.4E-05 | N.D.    | -                    | -                    |
| 2-Hydroxyoctanoic acid             | 5.4E-05       | N.D.    | N.D.    | N.D.    | N.D.    | N.D.    | 5.4E-05 | N.D.    | -                    | -                    |
| Acetoacetic acid                   | N.D.          | N.D.    | 2.9E-04 | N.D.    | N.D.    | N.D.    | 2.9E-04 | N.D.    | -                    | -                    |
| Glutaric acid                      | N.D.          | 3.5E-04 | N.D.    | N.D.    | N.D.    | N.D.    | 3.5E-04 | N.D.    | -                    | -                    |
| Isobutyric acid                    | N.D.          | 2.9E-03 | N.D.    | N.D.    | N.D.    | N.D.    | 2.9E-03 | N.D.    | -                    | -                    |
| Butyric acid                       | N.D.          | 2.9E-03 | N.D.    | N.D.    | N.D.    | N.D.    | 2.9E-03 | N.D.    | -                    | -                    |
| Piperidine                         | N.D.          | N.D.    | 3.3E-05 | N.D.    | N.D.    | N.D.    | 3.3E-05 | N.D.    | -                    | -                    |
| Propionic acid                     | N.D.          | 1.4E-03 | N.D.    | N.D.    | N.D.    | N.D.    | 1.4E-03 | N.D.    | -                    | -                    |
| XC0065                             | 5.8E-05       | N.D.    | N.D.    | N.D.    | N.D.    | N.D.    | 5.8E-05 | N.D.    | -                    | -                    |
| AMP                                | N.D.          | N.D.    | 2.4E-04 | 4.3E-03 | 2.3E-03 | 4.9E-03 | 2.4E-04 | 3.8E-03 | 16                   | -                    |
| GMP                                | N.D.          | N.D.    | 1.4E-04 | 8.1E-04 | 5.1E-04 | 9.1E-04 | 1.4E-04 | 7.4E-04 | 5.3                  | -                    |
| UMP                                | N.D.          | N.D.    | 8.8E-05 | 3.3E-04 | 2.0E-04 | 5.4E-04 | 8.8E-05 | 3.5E-04 | 4.0                  | -                    |
| XC0126                             | N.D.          | 3.6E-05 | N.D.    | 6.5E-05 | 7.7E-05 | 5.3E-05 | 3.6E-05 | 6.5E-05 | 1.8                  | -                    |
| XA0017                             | N.D.          | N.D.    | 5.6E-05 | 1.1E-04 | 8.8E-05 | N.D.    | 5.6E-05 | 1.0E-04 | 1.8                  | -                    |
| Hypoxanthine                       | N.D.          | N.D.    | 5.0E-04 | 1.2E-03 | 6.5E-04 | 5.5E-04 | 5.0E-04 | 8.0E-04 | 1.6                  | -                    |
| p-Coumaric acid                    | N.D.          | 8.0E-05 | N.D.    | 1.2E-04 | 1.6E-04 | 9.2E-05 | 8.0E-05 | 1.2E-04 | 1.5                  | -                    |
| Glucaric acid                      | 6.6E-05       | N.D.    | N.D.    | 6.4E-05 | N.D.    | 1.1E-04 | 6.6E-05 | 8.9E-05 | 1.4                  | -                    |
| Xanthine                           | N.D.          | N.D.    | 4.9E-04 | 9.0E-04 | 5.5E-04 | 4.2E-04 | 4.9E-04 | 6.2E-04 | 1.3                  | -                    |
| 2,5-Dihydroxybenzoic acid          | N.D.          | 6.0E-05 | N.D.    | N.D.    | 7.2E-05 | N.D.    | 6.0E-05 | 7.2E-05 | 1.2                  | -                    |
| Fructose 6-phosphate               | N.D.          | 6.8E-05 | N.D.    | N.D.    | 7.3E-05 | 8.4E-05 | 6.8E-05 | 7.9E-05 | 1.2                  | -                    |
| 3-Hydroxykynurenine                | 5.9E-05       | N.D.    | N.D.    | 5.7E-05 | 7.5E-05 | N.D.    | 5.9E-05 | 6.6E-05 | 1.1                  | -                    |
| Triethanolamine                    | N.D.          | 8.8E-05 | 7.5E-05 | 8.3E-05 | N.D.    | N.D.    | 8.2E-05 | 8.3E-05 | 1.0                  | -                    |
| XA0027                             | N.D.          | 3.4E-04 | N.D.    | 3.3E-04 | 3.2E-04 | N.D.    | 3.4E-04 | 3.3E-04 | 1.0                  | -                    |
| XA0002                             | 5.0E-04       | N.D.    | N.D.    | N.D.    | N.D.    | 4.2E-04 | 5.0E-04 | 4.2E-04 | 0.8                  | -                    |
| Pelargonic acid                    | 4.3E-04       | N.D.    | N.D.    | 3.8E-04 | 3.7E-04 | 3.3E-04 | 4.3E-04 | 3.6E-04 | 0.8                  | -                    |
| N <sup>8</sup> -Acetylspermidine   | N.D.          | 5.4E-05 | 3.8E-05 | 3.7E-05 | N.D.    | N.D.    | 4.6E-05 | 3.7E-05 | 0.8                  | -                    |
| XA0036                             | 8.4E-05       | N.D.    | N.D.    | 6.7E-05 | N.D.    | 4.6E-05 | 8.4E-05 | 5.6E-05 | 0.7                  | -                    |
| Ascorbate 2-sulfate                | 8.4E-05       | N.D.    | N.D.    | 6.7E-05 | N.D.    | 4.6E-05 | 8.4E-05 | 5.6E-05 | 0.7                  | -                    |
| Indole-3-acetic acid               | 9.5E-05       | 9.8E-05 | N.D.    | 6.2E-05 | N.D.    | N.D.    | 9.7E-05 | 6.2E-05 | 0.6                  | -                    |

\*Ratio of 0-4LD to SDC

†t-test, #p &lt; 0.05, ##p &lt; 0.01, ###p &lt; 0.001
